# Supplementary material for: Fluorogenic Substrates for In Situ Monitoring of Caspase-3 Activity in Live Cells
Source: PLoS One. 2016 May 11;11(5):e0153209. doi: 10.1371/journal.pone.0153209 (PMC4864350; doi:10.1371/journal.pone.0153209)
Supplement: S1 Table — (PDF) [file pone.0153209.s012.pdf]

**S1 Table. MALDI-TOF MS and HPLC analysis of substrates 1–27.** MALDI-TOF mass spectra were performed using a Bruker UltraflexExtreme MALDI TOF/TOF instrument and analysed with the Bruker Daltonics flexAnalysis software. For peptide/peptoid analysis, sinapic acid was used as a matrix and positive ion mass spectra were recorded. HPLC analyses were performed on an Agilent 1100 analytical system equipped a Supelco Discovery® C18 column (5 µm, 5 cm) coupled to a Polymer laboratories 100 ES evaporative light scattering detector (ELSD). Eluting from 5% A (H<sub>2</sub>O + 0.1% formic acid) to 95% (MeOH + 0.1% formic acid) over 8 min, followed by isocratic 95% B for 1 min, at a flow rate of 1 mL/min. Semipreparative HPLC purifications were performed on an Eclipse XDB-C18 column (9.4 x 250 mm, 5 µm), at a flow rate of 2 mL/min, with detection/collection at 254 nm. The following gradient was used: 5 to 50 % A over 6 min, 50 to 100% B for 30 min.

|    | Sequence       | MW [calc.]                        | MALDI-TOF | HPLC purity (%) |
|----|----------------|-----------------------------------|-----------|-----------------|
| 1  | DEVD           | (M+H) <sup>+</sup> 2845.8         | 2845.1    | 100             |
| 2  | DEVD           | (M+H) <sup>+</sup> 2837.7         | 2837.1    | 92              |
| 3  | DEVD           | (M+H) <sup>+</sup> 2883.7         | 2883.9    | 75              |
| 4  | DPVD           | (M+H) <sup>+</sup> 2813.8         | 2813.3    | 93              |
| 5  | DGVD           | (M+H) <sup>+</sup> 2774.6         | 2774.2    | 97              |
| 6  | DAVD           | (M+H) <sup>+</sup> 2788.6         | 2788.3    | 99              |
| 7  | DLVD           | (M+H) <sup>+</sup> 2829.8         | 2829.4    | 96              |
| 8  | DNVD           | (M+H) <sup>+</sup> 2829.8         | 2829.4    | 98              |
| 9  | DVVD           | (M+H) <sup>+</sup> 2816.6         | 2816.3    | 99              |
| 10 | DGPD           | (M+TFA-H) <sup>+</sup> 2881.7     | 2881.6    | 93              |
| 11 | DAPD           | (M+TFA-H) <sup>+</sup> 2895.7     | 2895.5    | 95              |
| 12 | DLPD           | (M+TFA-H) <sup>+</sup> 2937.8     | 2934.3    | 90              |
| 13 | DNPD           | (M+TFA-H) <sup>+</sup> 2938.7     | 2937.4    | 94              |
| 14 | DVPD           | (M+TFA-H) <sup>+</sup> 2923.7     | 2923.0    | 100             |
| 15 | dgvd           | (M+Na+K) <sup>+</sup> 2832.7      | 2832.4    | 100             |
| 16 | davd           | (M+Na+K) <sup>+</sup> 2847.7      | 2847.5    | 100             |
| 17 | dlvd           | (M+Na+K) <sup>+</sup> 2889.7      | 2889.3    | 100             |
| 18 | dnvd           | (M+Na+K) <sup>+</sup> 2890.7      | 2890.3    | 100             |
| 19 | dvvvd          | (M+Na+K) <sup>+</sup> 2875.7      | 2875.4    | 100             |
| 20 | dgpd           | (M+Na+K) <sup>+</sup> 2831.7      | 2831.4    | 100             |
| 21 | dapd           | (M+Na+K) <sup>+</sup> 2845.7      | 2845.5    | 100             |
| 22 | dlpd           | (M+Na+K) <sup>+</sup> 2887.7      | 2887.4    | 100             |
| 23 | dnpd           | (M+Na+K) <sup>+</sup> 2888.7      | 2888.3    | 100             |
| 24 | dvpd           | (M+Na+K) <sup>+</sup> 2873.7      | 2873.4    | 100             |
| 25 | DLPD-Ahx-k     | (M + H) <sup>+</sup> 2827.7       | 2827.5    | 100             |
| 26 | DLPD-Ahx-K(Me) | (M + 2Na - H) <sup>+</sup> 2883.6 | 2883.9    | 100             |
| 27 | DLPD-K-Ahx     | (M + H) <sup>+</sup> 2827.7       | 2827.7    | 100             |
