# Supplementary material for: Fluorogenic Substrates for In Situ Monitoring of Caspase-3 Activity in Live Cells
Source: PLOS journal article supplement (doi:10.1371/journal.pone.0153209), 2016-05-11
Supplement: S3 (10.1371/journal.pone.0153209.s003) [file journal.pone.0153209.s003]

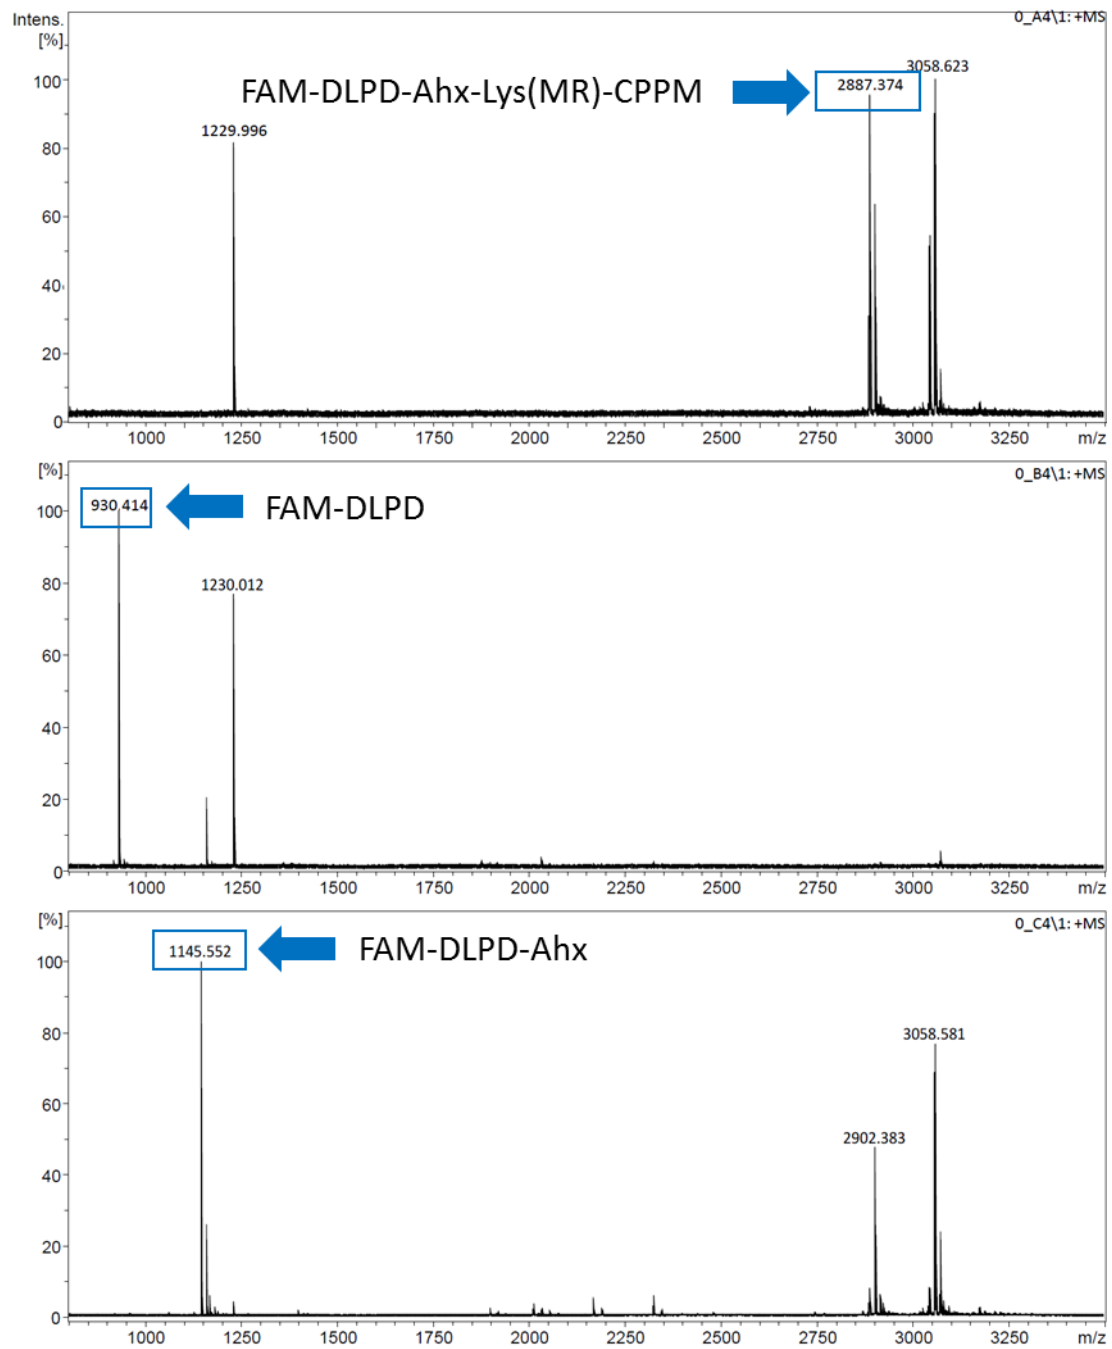

**S3 Fig.** A) MALDI-TOF MS spectra of substrate **12** (sequence Asp-Leu-Pro-Asp). (B) After incubation (20  $\mu$ M) with Caspase-3 for 2 h. (C) After incubation (20  $\mu$ M) with Caspase-7 for 2 h (detected as the PBS adduct.)
