# Supplementary material for: Fluorogenic Substrates for In Situ Monitoring of Caspase-3 Activity in Live Cells
Source: PLOS journal article supplement (doi:10.1371/journal.pone.0153209), 2016-05-11
Supplement: S7 (10.1371/journal.pone.0153209.s007) [file journal.pone.0153209.s007]

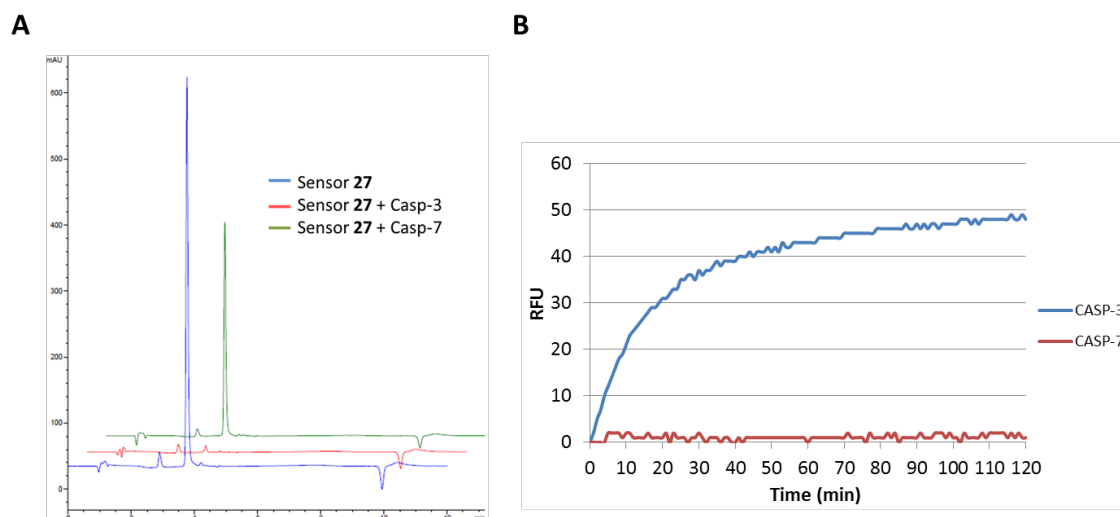

**S7 Fig.** (A) HPLC chromatogram (detection at 254 nm) of substrate **27** (10  $\mu$ M) after 120 min incubation with caspase-3 or caspase-7 (0.3  $\mu$ M). (B) Time-dependent increase in fluorescence ( $\lambda_{\text{Ex/Em}}$  485/528 nm) of **27** (0.6  $\mu$ M) during 120 min incubation with caspase-3 or -7 (15 nM).
